# Supplementary material for: Brighter children? The association between seasonality of birth and child IQ in a population-based birth cohort
Source: PubMed Central journal article supplement — BMJ Open. 2017 Feb 17;7(2):e012406. doi: 10.1136/bmjopen-2016-012406 (PMC5318550; doi:10.1136/bmjopen-2016-012406), 2017-02-17

**Supplementary Figure 1.** Total live births per month in the Netherlands (2002-2006)

The figure depicts the total annual live births per month in the Netherlands of the years 2002-2006 based on data from Statistics Netherlands.

Counts are corrected for the length of the month by setting the duration of each month to 30 days.

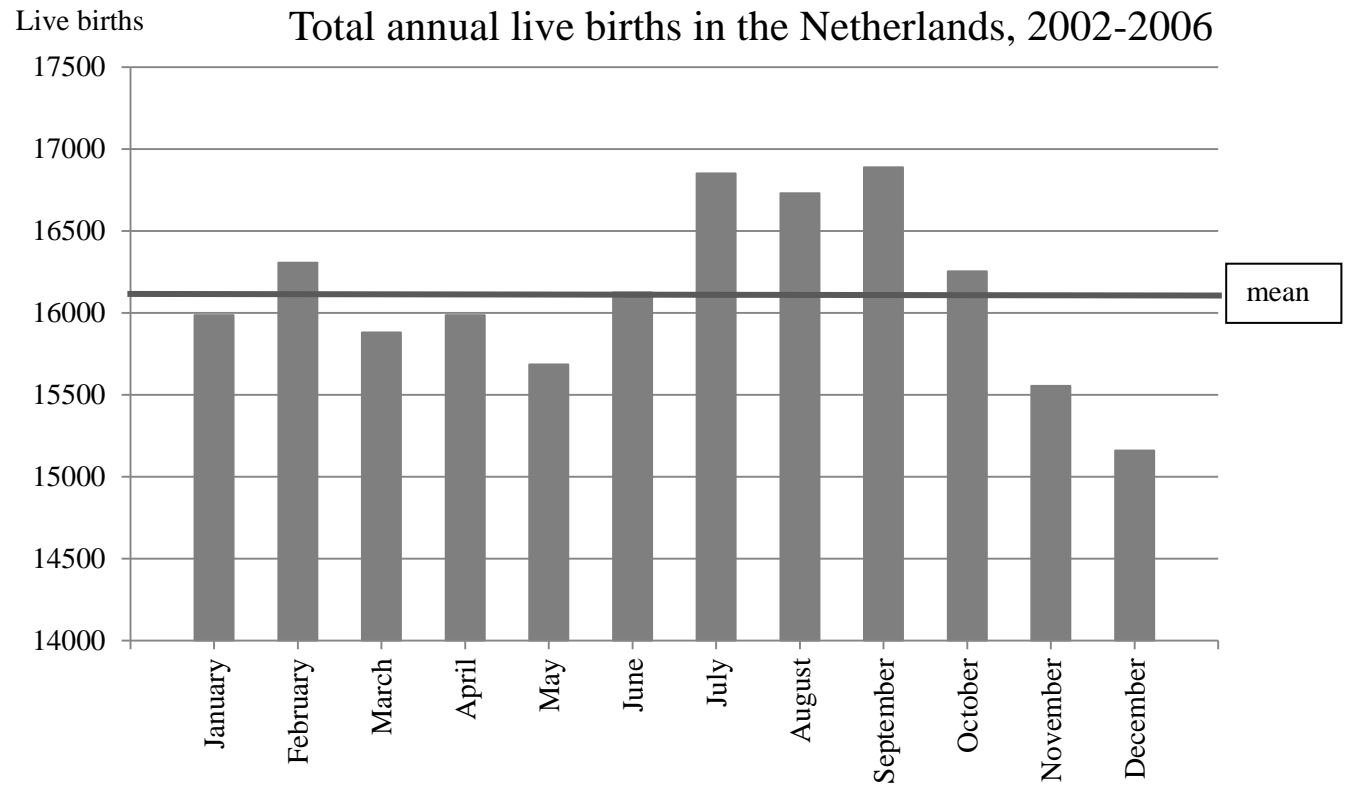

Supplement: bmjopen-2016-012406supp_figure1.pdf [file bmjopen-2016-012406supp_figure1.pdf]
