# Supplementary material for: Brighter children? The association between seasonality of birth and child IQ in a population-based birth cohort
Source: PubMed Central journal article supplement — BMJ Open. 2017 Feb 17;7(2):e012406. doi: 10.1136/bmjopen-2016-012406 (PMC5318550; doi:10.1136/bmjopen-2016-012406), 2017-02-17
Supplement: bmjopen-2016-012406supp_figure2.pdf [file bmjopen-2016-012406supp_figure2.pdf]

**Supplemental Figure 2.** Diagrams illustrating two potential roles of covariates in the association between child season of birth and child IQ:

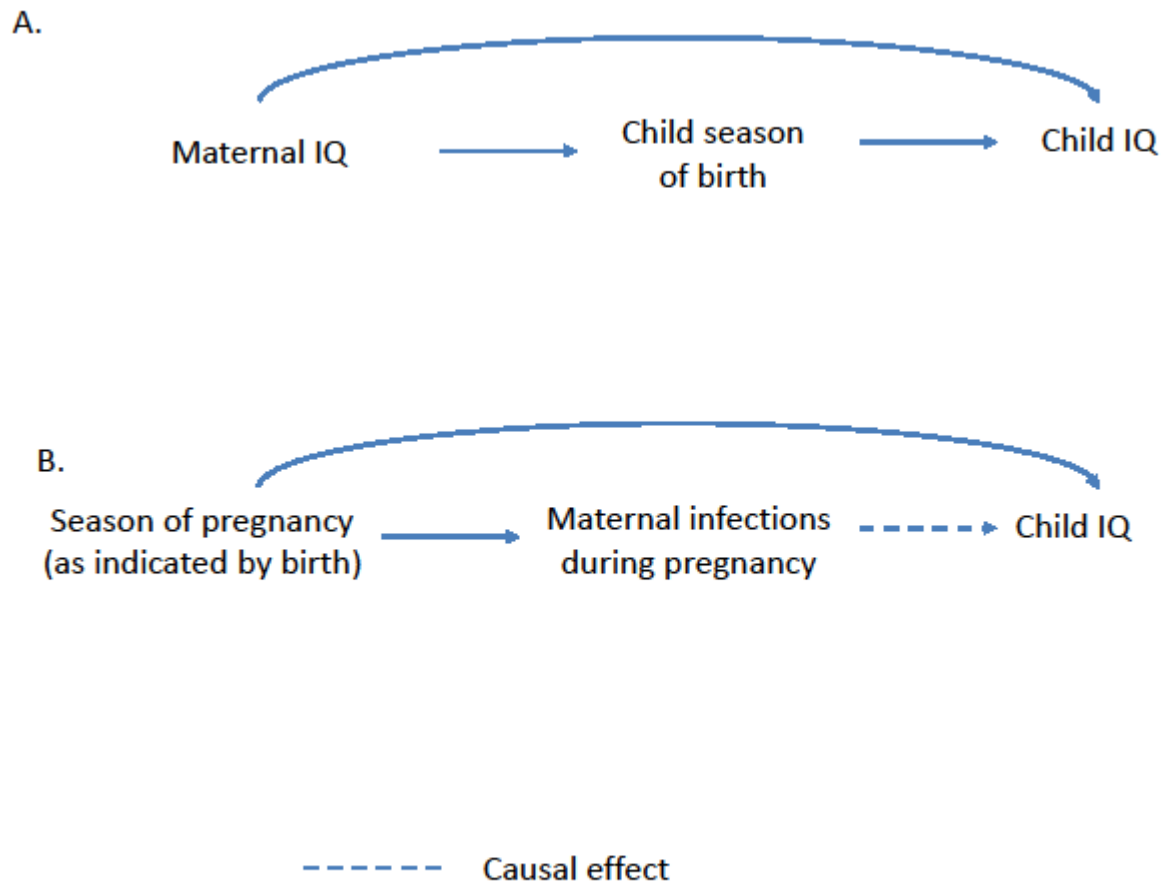

A. Maternal IQ as shared cause in child season of birth and child IQ.

B. Maternal infections on the causal pathway in the association of child season of birth and child IQ.

For simplicity, these diagrams do not include other shared causes.
