# Supplementary material for: Brighter children? The association between seasonality of birth and child IQ in a population-based birth cohort
Source: PubMed Central journal article supplement — BMJ Open. 2017 Feb 17;7(2):e012406. doi: 10.1136/bmjopen-2016-012406 (PMC5318550; doi:10.1136/bmjopen-2016-012406), 2017-02-17
Supplement: bmjopen-2016-012406supp_tables.pdf [file bmjopen-2016-012406supp_tables.pdf]

**Supplementary Table 1.** Bivariate correlations for predictor and outcome variables (N=6,034)

|                                                       | 1      | 2      | 3      | 4      | 5      | 6      | 7      | 8      | 9      | 10     | 11     | 12     | 13    | 14     | 15    | 16     | 17     | 18     | 19     | 20    | 21    | 22     | 23    | 24  | 25  | 26 |
|-------------------------------------------------------|--------|--------|--------|--------|--------|--------|--------|--------|--------|--------|--------|--------|-------|--------|-------|--------|--------|--------|--------|-------|-------|--------|-------|-----|-----|----|
| 1. child IQ                                           | 1      |        |        |        |        |        |        |        |        |        |        |        |       |        |       |        |        |        |        |       |       |        |       |     |     |    |
| 2. child birth season, spring                         | -.02   | 1      |        |        |        |        |        |        |        |        |        |        |       |        |       |        |        |        |        |       |       |        |       |     |     |    |
| 3. child birth season, autumn                         | .01    | -.34** | 1      |        |        |        |        |        |        |        |        |        |       |        |       |        |        |        |        |       |       |        |       |     |     |    |
| 4. child birth season, winter                         | -.01   | -.30** | -.33** | 1      |        |        |        |        |        |        |        |        |       |        |       |        |        |        |        |       |       |        |       |     |     |    |
| 5. maternal age, years                                | .18**  | .01    | .02    | .002   | 1      |        |        |        |        |        |        |        |       |        |       |        |        |        |        |       |       |        |       |     |     |    |
| 6. national origin, other western                     | .03*   | .02    | -.003  | -.004  | .07**  | 1      |        |        |        |        |        |        |       |        |       |        |        |        |        |       |       |        |       |     |     |    |
| 7. national origin, non-western                       | -.27** | .000   | -.01   | -.01   | -.29** | -.25** | 1      |        |        |        |        |        |       |        |       |        |        |        |        |       |       |        |       |     |     |    |
| 8. parity, nulliparous                                | .08**  | -.03** | .03**  | -.01   | -.28** | .01    | -.08** | 1      |        |        |        |        |       |        |       |        |        |        |        |       |       |        |       |     |     |    |
| 9. maternal education, low                            | -.09** | .07    | .004   | -.01   | -.03*  | -.04** | .23**  | -.11** | 1      |        |        |        |       |        |       |        |        |        |        |       |       |        |       |     |     |    |
| 10. maternal education, mid                           | -.12** | .002   | -.01   | .01    | -.17** | -.05** | .15**  | -.01   | -.14** | 1      |        |        |       |        |       |        |        |        |        |       |       |        |       |     |     |    |
| 11. maternal IQ                                       | .31**  | -.02   | .08    | -.01   | .18**  | .08**  | -.39** | .11**  | -.22** | -.21** | 1      |        |       |        |       |        |        |        |        |       |       |        |       |     |     |    |
| 12. maternal fat intake, energy %                     | .07    | .03*   | -.05** | .01    | .04**  | .02    | -.02   | -.07** | .01    | -.01   | .01    | 1      |       |        |       |        |        |        |        |       |       |        |       |     |     |    |
| 13. maternal carbohydrate intake, energy %            | -.04** | -.02   | .03*   | -.01   | -.12** | -.03   | .03    | .07**  | -.01   | .01**  | -.04*  | -.90** | 1     |        |       |        |        |        |        |       |       |        |       |     |     |    |
| 14. maternal plasma folate concentration, nmol/L      | .16**  | -.01   | .02    | .04*   | .23**  | .08**  | -.27** | .12**  | -.10** | -.10** | .23**  | -.01   | -.01  | 1      |       |        |        |        |        |       |       |        |       |     |     |    |
| 15. child relative age in class, years                | -.01   | -.17** | .60**  | .28**  | .02    | -.01   | -.01   | .01    | -.004  | .001   | .001   | -.02   | .01   | .04**  | 1     |        |        |        |        |       |       |        |       |     |     |    |
| 16. season at child IQ assessment, spring             | -.01   | .22**  | -.17** | -.04** | .03*   | -.001  | -.01   | -.03*  | .01    | 0      | -.01   | .02    | -.02  | -.02   | .10** | 1      |        |        |        |       |       |        |       |     |     |    |
| 17. season at child IQ assessment, autumn             | -.001  | -.21** | .18**  | .02    | -.03*  | -.01   | .03*   | .02    | -.01   | .01    | -.01   | -.03*  | .04*  | -.002  | .12** | -.36** | 1      |        |        |       |       |        |       |     |     |    |
| 18. season at child IQ assessment, winter             | .03*   | .07**  | -.08** | .19**  | .01    | .002   | -.01   | -.01   | .01    | -.03*  | -.01   | .02    | -.02  | .01    | .10** | -.31** | -.33** | 1      |        |       |       |        |       |     |     |    |
| 19. maternal vitamin D plasma concentration, nmol/L   | .20**  | -.11** | .16**  | .13**  | .21**  | .07**  | -.50** | .11**  | -.15** | -.07** | .29**  | -.01   | -.02  | .35**  | .22** | -.06** | .04*   | .03*   | 1      |       |       |        |       |     |     |    |
| 20. cord blood vitamin D plasma concentration, nmol/L | .19**  | -.12** | .01    | -.19** | .22**  | .05**  | -.47** | .09**  | -.14** | -.07** | .27**  | .002   | -.03  | .28**  | .20** | -.02   | .02    | -.10** | -.55** | 1     |       |        |       |     |     |    |
| 21. child birth weight, SD-score                      | .12**  | -.01   | -.02   | .01    | .12**  | .02    | -.13** | -.18** | -.01   | -.04** | .08**  | .02    | -.04* | .07**  | .01   | .01    | -.02   | .01    | .08**  | .08** | 1     |        |       |     |     |    |
| 22. gestational duration, weeks                       | .09**  | -.01   | .02    | -.02   | .02    | .02    | -.04** | -.02   | .01    | -.06** | .05**  | .02    | -.02  | .002   | .01   | -.01   | -.01   | .02    | .02    | -.01  | .07** | 1      |       |     |     |    |
| 23. fever during early pregnancy, yes                 | -.001  | -.01   | .02    | -.05** | .01    | -.01   | .02    | -.08*  | .002   | -.01   | -.001  | -.02   | .03   | -.04*  | .02   | .003   | .01    | -.02   | -.02   | -.01  | .02   | .01    | 1     |     |     |    |
| 24. fever during mid pregnancy, yes                   | -.02   | .02    | -.04** | -.04** | .02    | -.01   | .004   | -.05*  | .01    | -.003  | -.04*  | -.01   | .01   | -.03   | .07** | .02    | -.02   | -.004  | -.03   | -.01  | .02   | .001   | .21** | 1   |     |    |
| 25. fever during late pregnancy, yes                  | .004   | .06**  | -.05** | -.03*  | .01    | -.02   | .01    | -.02   | .01    | .002   | -.01   | .03*   | -.03* | -.03   | .05** | .04*   | -.02   | -.006  | -.03   | -.01  | -.01  | -.02   | .11** | .26 | 1   |    |
| 26. maternal CRP concentration, mg/L                  | -.06** | .05**  | -.03   | -.02   | .01    | -.05** | .05**  | -.12** | .02    | .07**  | -.10** | -.01   | .02   | -.05** | .02   | -.001  | .01    | -.001  | -.06** | -.04* | .01   | -.05** | .06   | .13 | .04 | 1  |

Values represent Pearson correlation coefficients. \*  $P < 0.05$ , \*\*  $P < 0.01$ . CRP= maternal C-reactive protein, mg/L.

**Supplementary Table 2.** Change of the association between child season of birth and IQ at age 6 years with addition of covariates to the basic model each in a separate model (n=6,034)

|                               | <b>Child IQ at age 6 years</b> |                                                          |                           |                                                                    |                                                                      |                                      |                                                    |                                                    |
|-------------------------------|--------------------------------|----------------------------------------------------------|---------------------------|--------------------------------------------------------------------|----------------------------------------------------------------------|--------------------------------------|----------------------------------------------------|----------------------------------------------------|
|                               | Basic model                    | Basic model + maternal socio-demographic characteristics | Basic model + maternal IQ | Basic model +maternal nutritional intake and one-carbon biomarkers | Basic model +child relative age in class and season at IQ assessment | Basic model +vitamin D plasma levels | Basic model +gestational duration and birth weight | Basic model +fever during pregnancy and CRP levels |
| <b>Spring*</b>                |                                |                                                          |                           |                                                                    |                                                                      |                                      |                                                    |                                                    |
| <b>Effect estimate change</b> |                                | 24.4%                                                    | 39.3%                     | 11.2%                                                              | 1.1%                                                                 | 124.8%***                            | 6.2%                                               | 8.3%                                               |
| <b>R<sup>2</sup>-change**</b> | 0.019                          | 0.088                                                    | 0.085                     | 0.034                                                              | 0.001                                                                | 0.050                                | 0.019                                              | 0.002                                              |
| <b>P-value</b>                | <0.001                         | <0.001                                                   | <0.001                    | <0.001                                                             | 0.03                                                                 | <0.001                               | <0.001                                             | 0.34                                               |
| <b>Seasonal trend</b>         |                                |                                                          |                           |                                                                    |                                                                      |                                      |                                                    |                                                    |
| <b>Effect estimate change</b> |                                | 10.3%                                                    | 37.5%                     | 0.5%                                                               | 6.0%                                                                 | 99.3%***                             | 5.3%                                               | 0.8%                                               |
| <b>R<sup>2</sup>-change**</b> | 0.020                          | 0.088                                                    | 0.085                     | 0.043                                                              | 0.001                                                                | 0.043                                | 0.019                                              | 0.023                                              |
| <b>P-value</b>                | <0.001                         | <.001                                                    | <.001                     | <.001                                                              | 0.045                                                                | <.001                                | .02                                                | <.001                                              |

*Results from linear regression analyses.*

*\*As compared with children born in summer. The other seasons are not shown.*

*Values represent beta, 95% confidence intervals, R<sup>2</sup>-change and P-values of model change. \*\*First column R<sup>2</sup>. \*\*\*This value reflects the unadjusted effect estimate change, which can be largely explained by “confounding” by maternal ethnicity. See Table 2 for adjusted estimate changes.*
